# Supplementary material
Source: HighWire-hosted journal article supplement (https://jnm.snmjournals.org/highwire/filestream/95381/field_highwire_adjunct_files/0/211706_Supplemental_Data.pdf)

**Supplemental Figure 1.** Funnel plot and Egger's test suggest that publication bias is present ( $p = 0.0809$ )

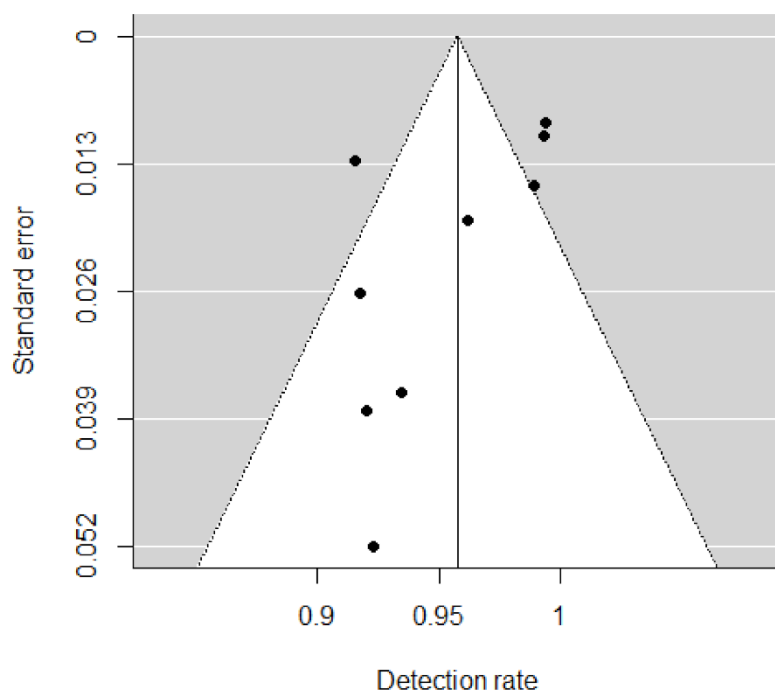

Supplement: 211706_Supplemental_Data.pdf [file 211706_Supplemental_Data.pdf]
